# Supplementary figures and images for: An H3K9 methylation-dependent protein interaction regulates the non-enzymatic functions of a putative histone demethylase
Source: eLife journal article supplement (doi:10.7554/elife.53155), 2020-03-20

Figure 1-figure supplement 1

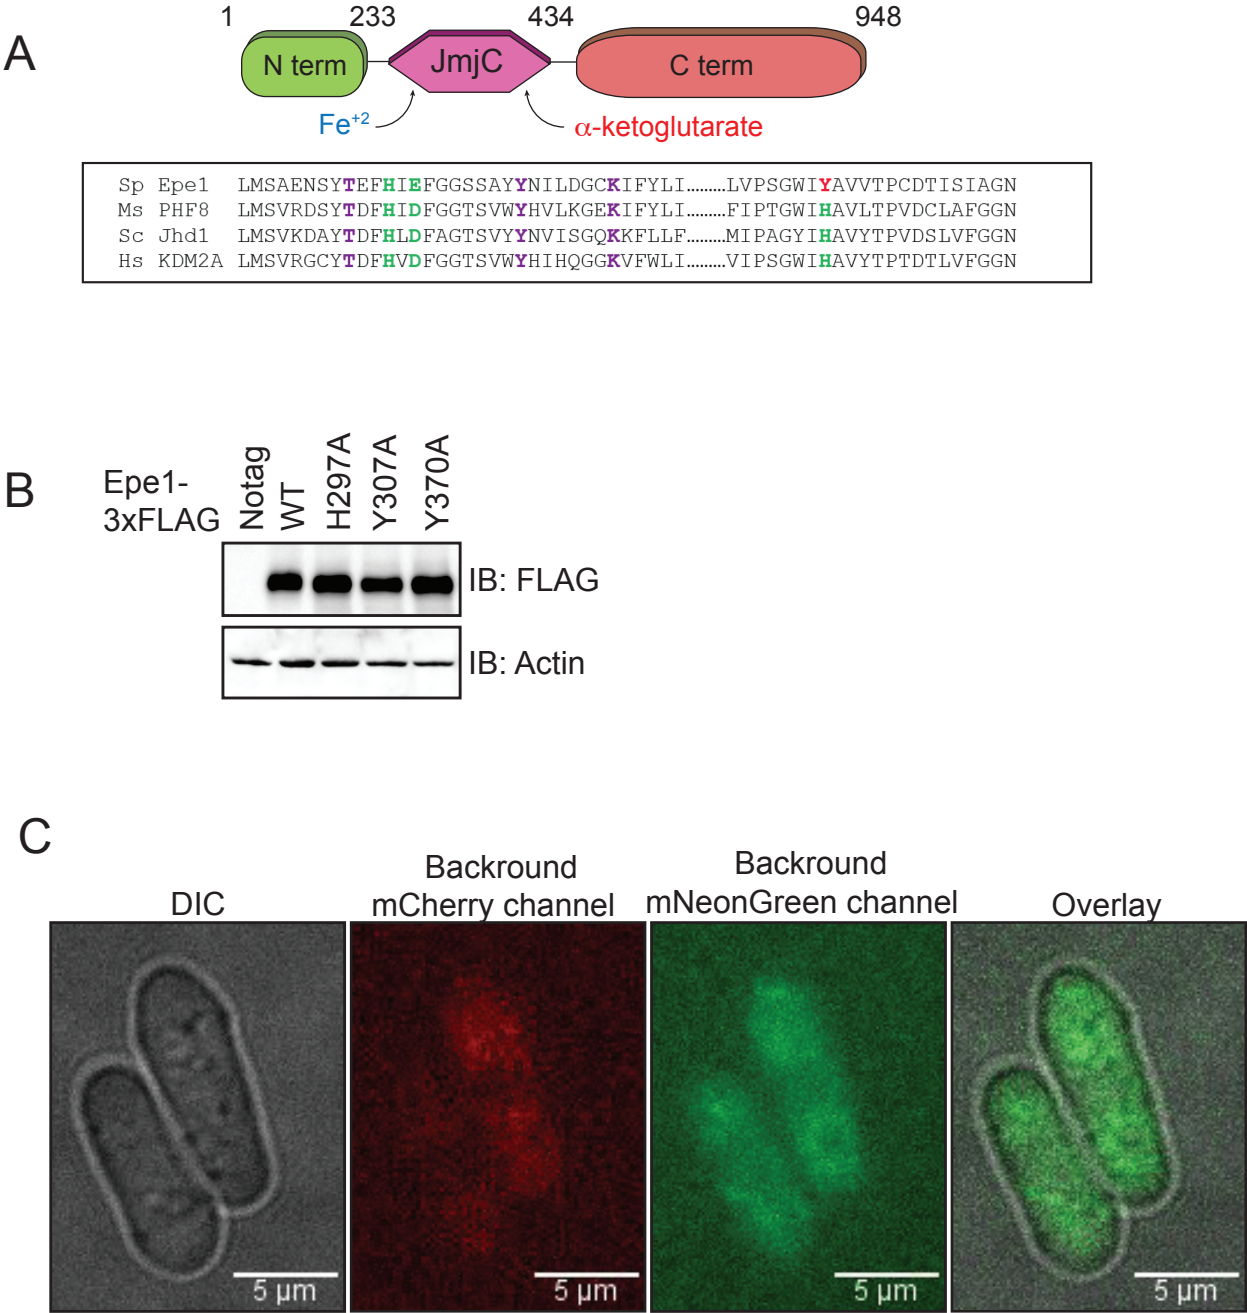

Supplement: supp [file elife_poa_e53155_Figure_1_figure_supplement_1.pdf › elife_poa_e53155_Figure_1_figure_supplement_1.pdf]

**Figure 2-figure supplement 1**

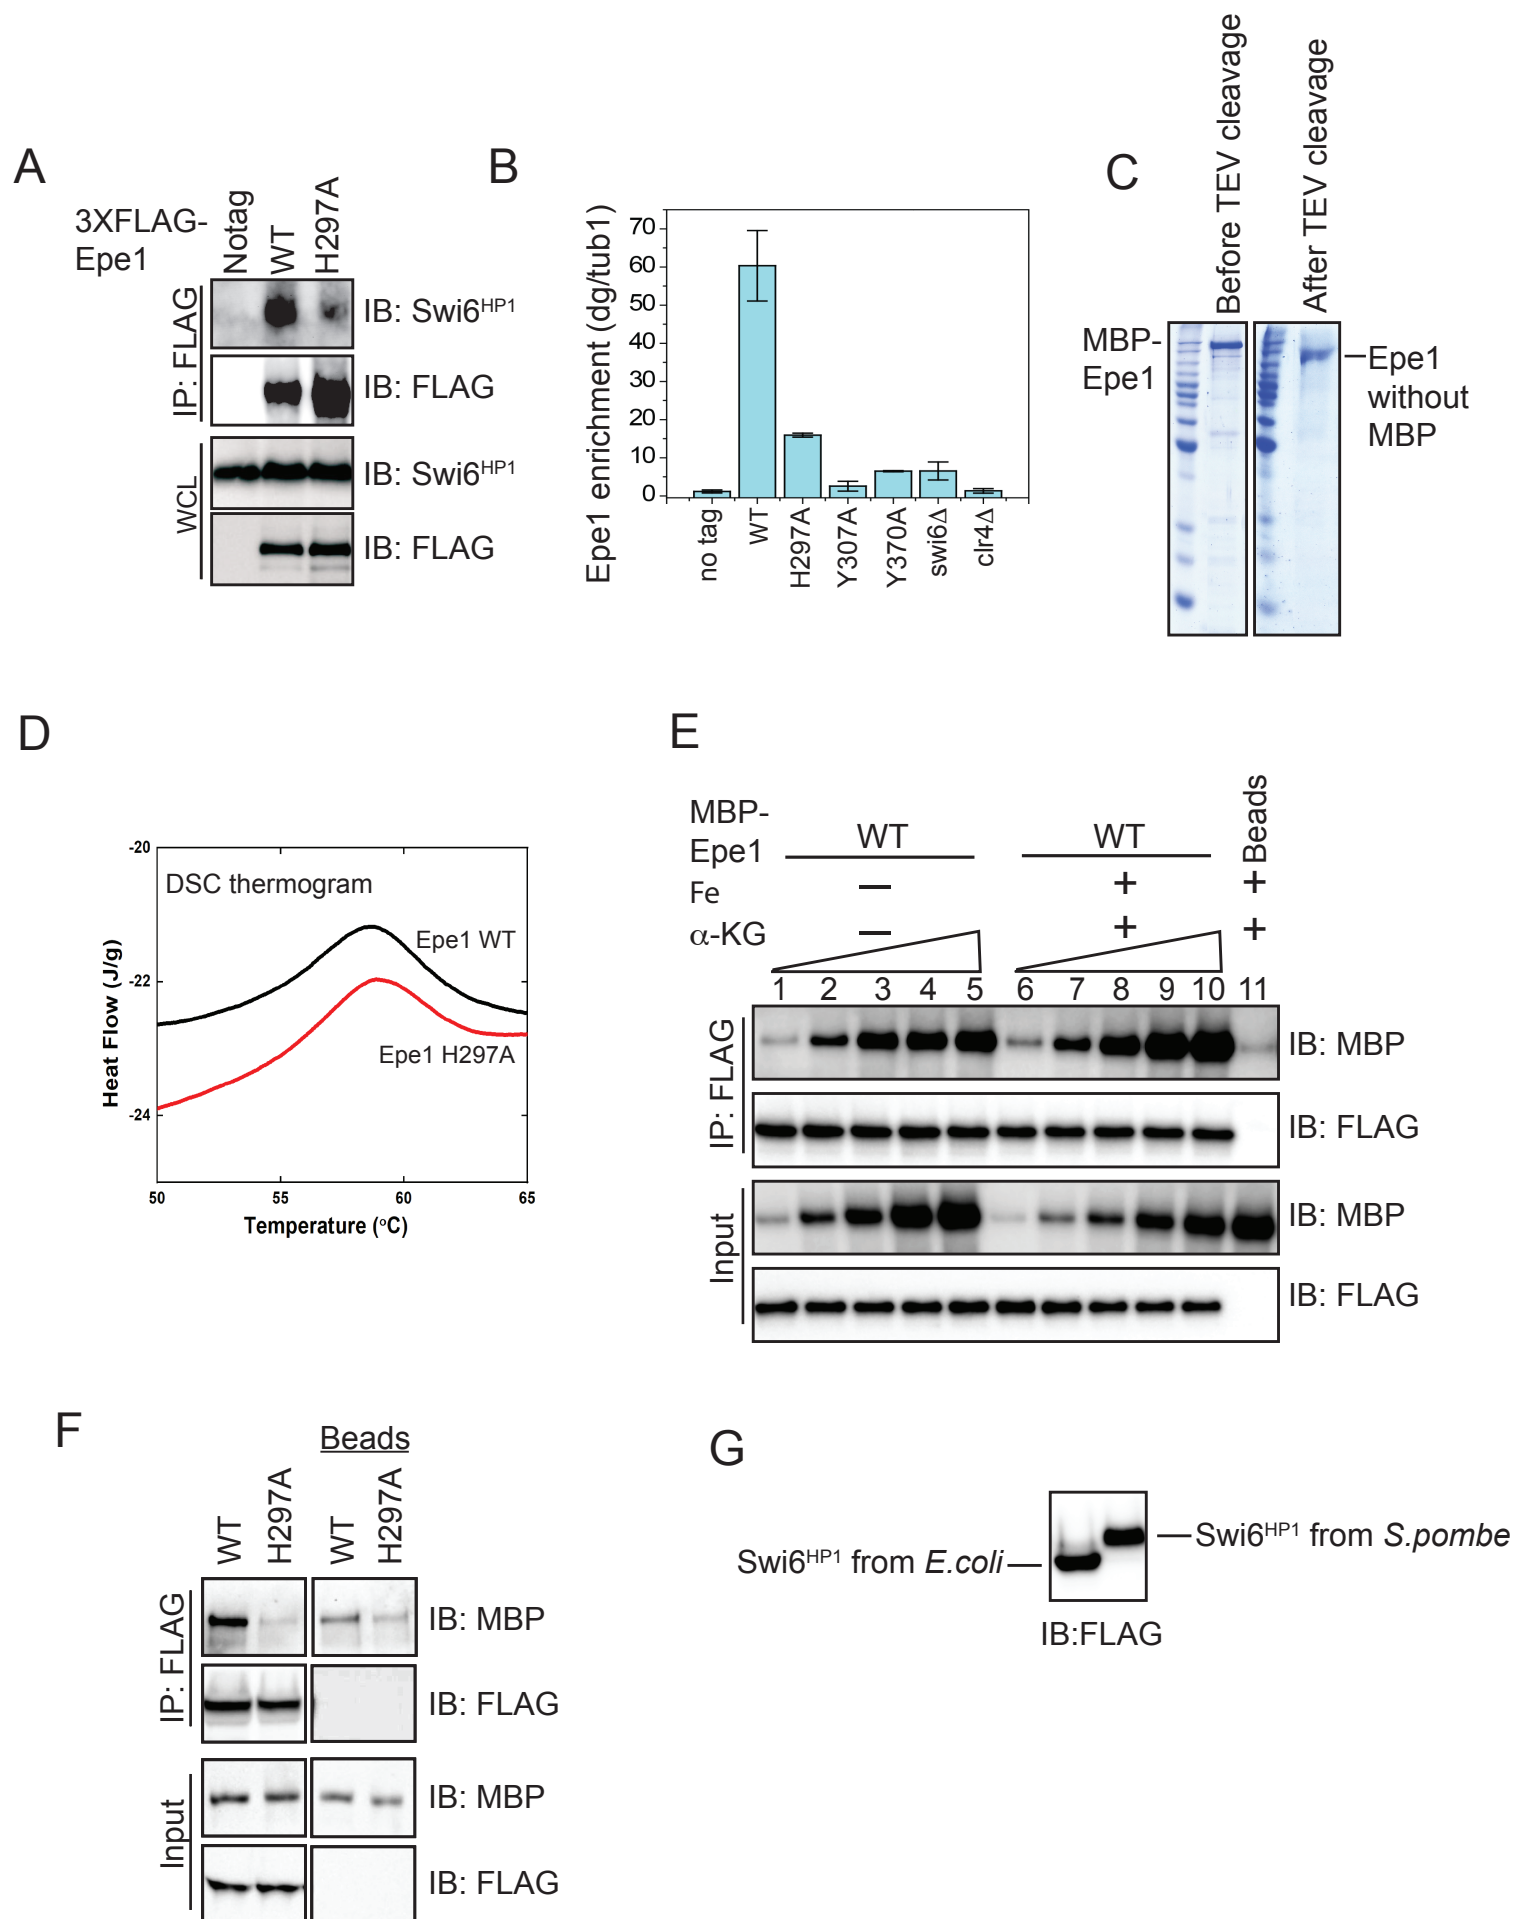

Figure 2-figure supplement 1

H

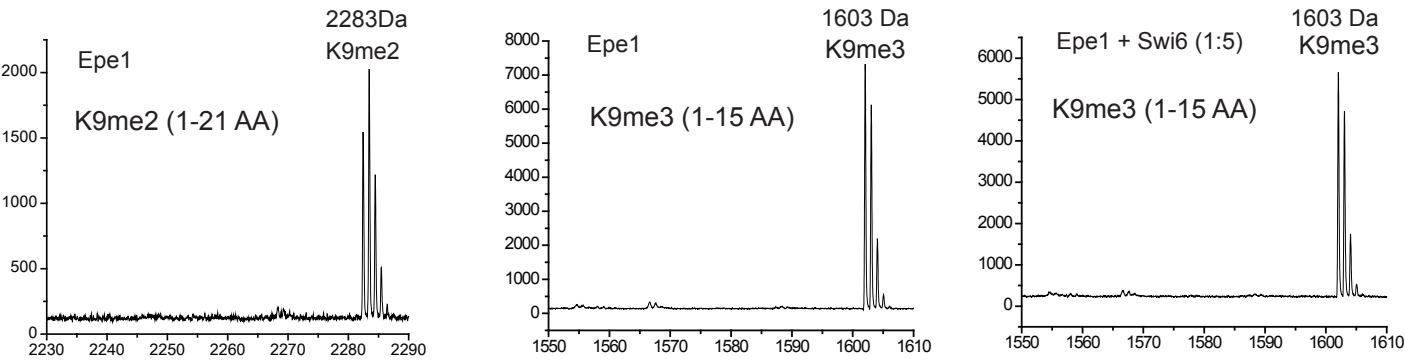

I

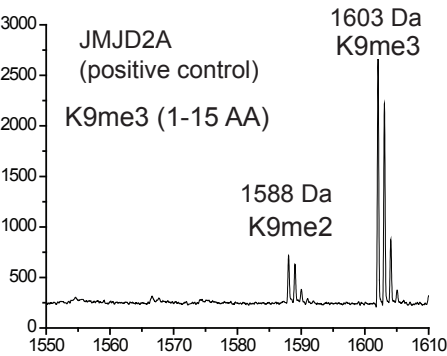

Supplement: supp [file elife_poa_e53155_Figure_2_figure_supplement_1.pdf › elife_poa_e53155_Figure_2_figure_supplement_1.pdf]

**Figure 3-figure supplement 1**

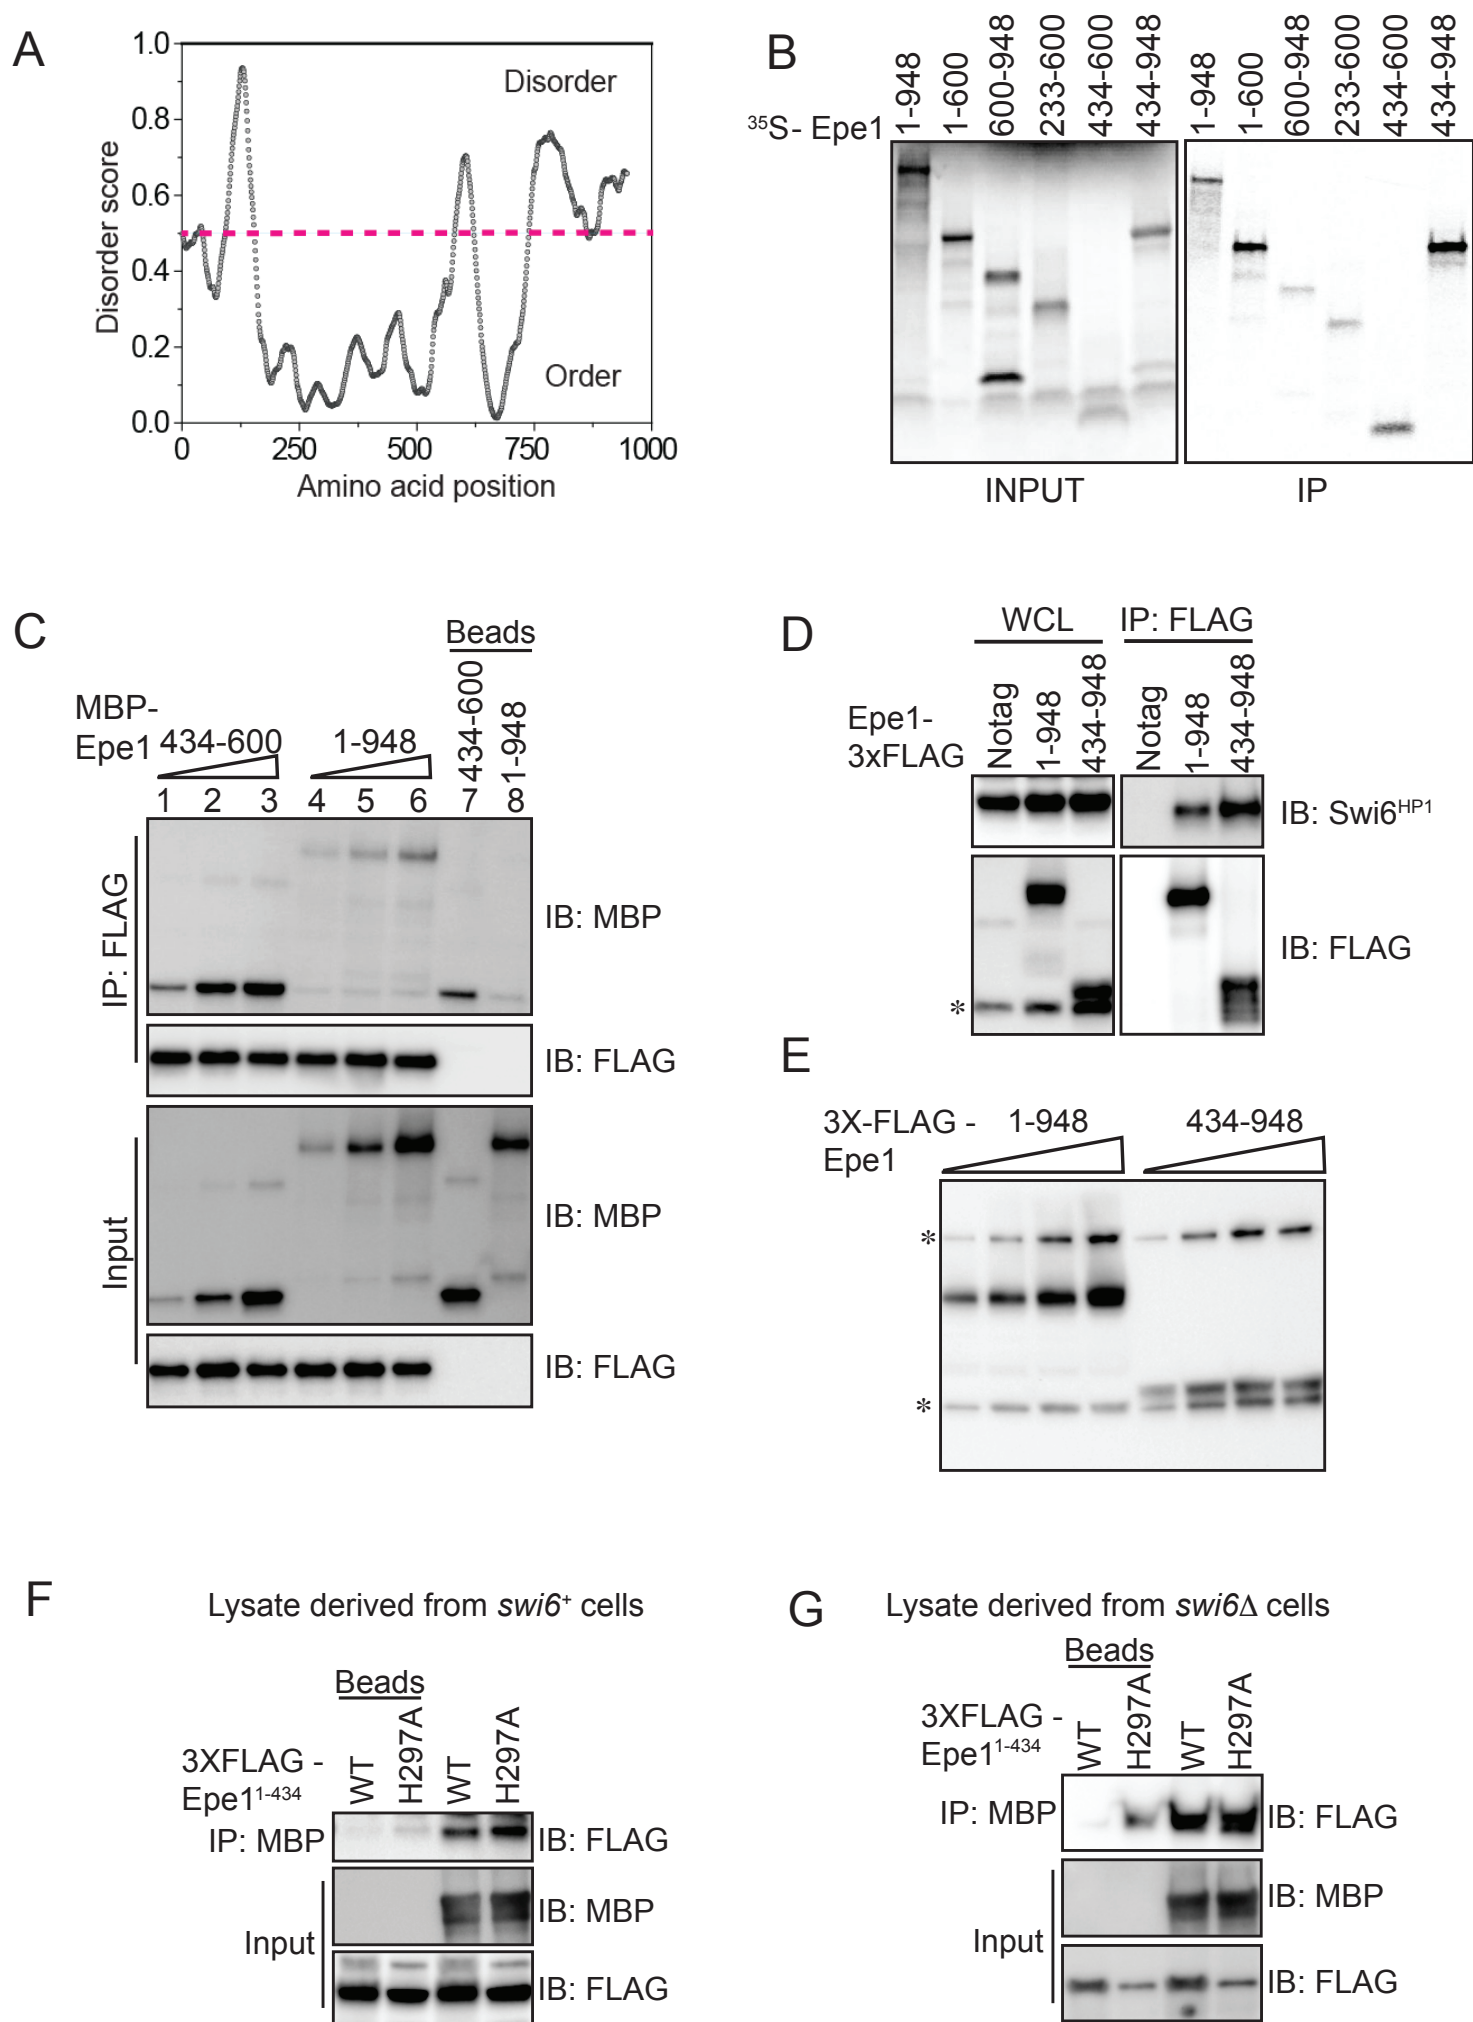

Figure 3-figure supplement 1

H

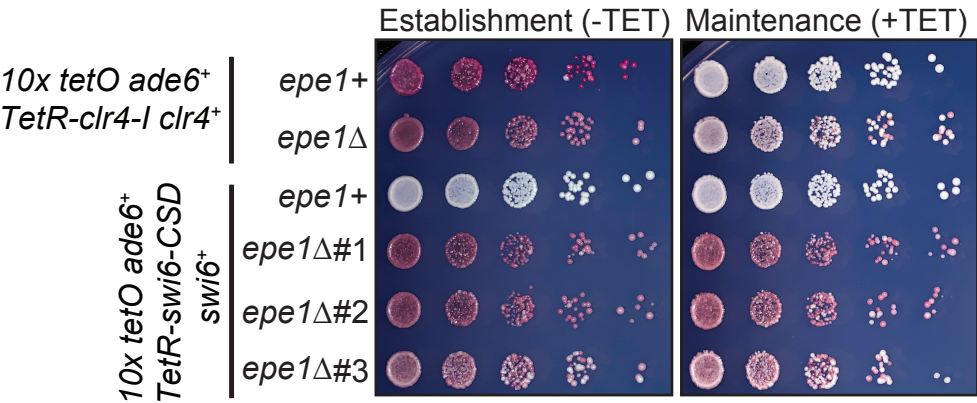

I

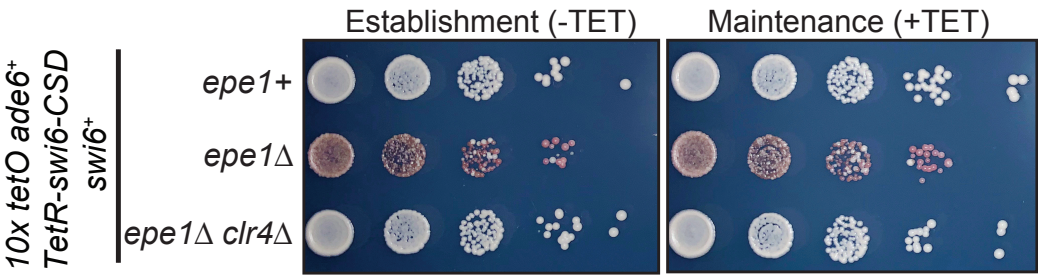

Supplement: supp [file elife_poa_e53155_Figure_3_figure_supplement_1.pdf › elife_poa_e53155_Figure_3_figure_supplement_1.pdf]

**Figure 4-figure supplement 1**

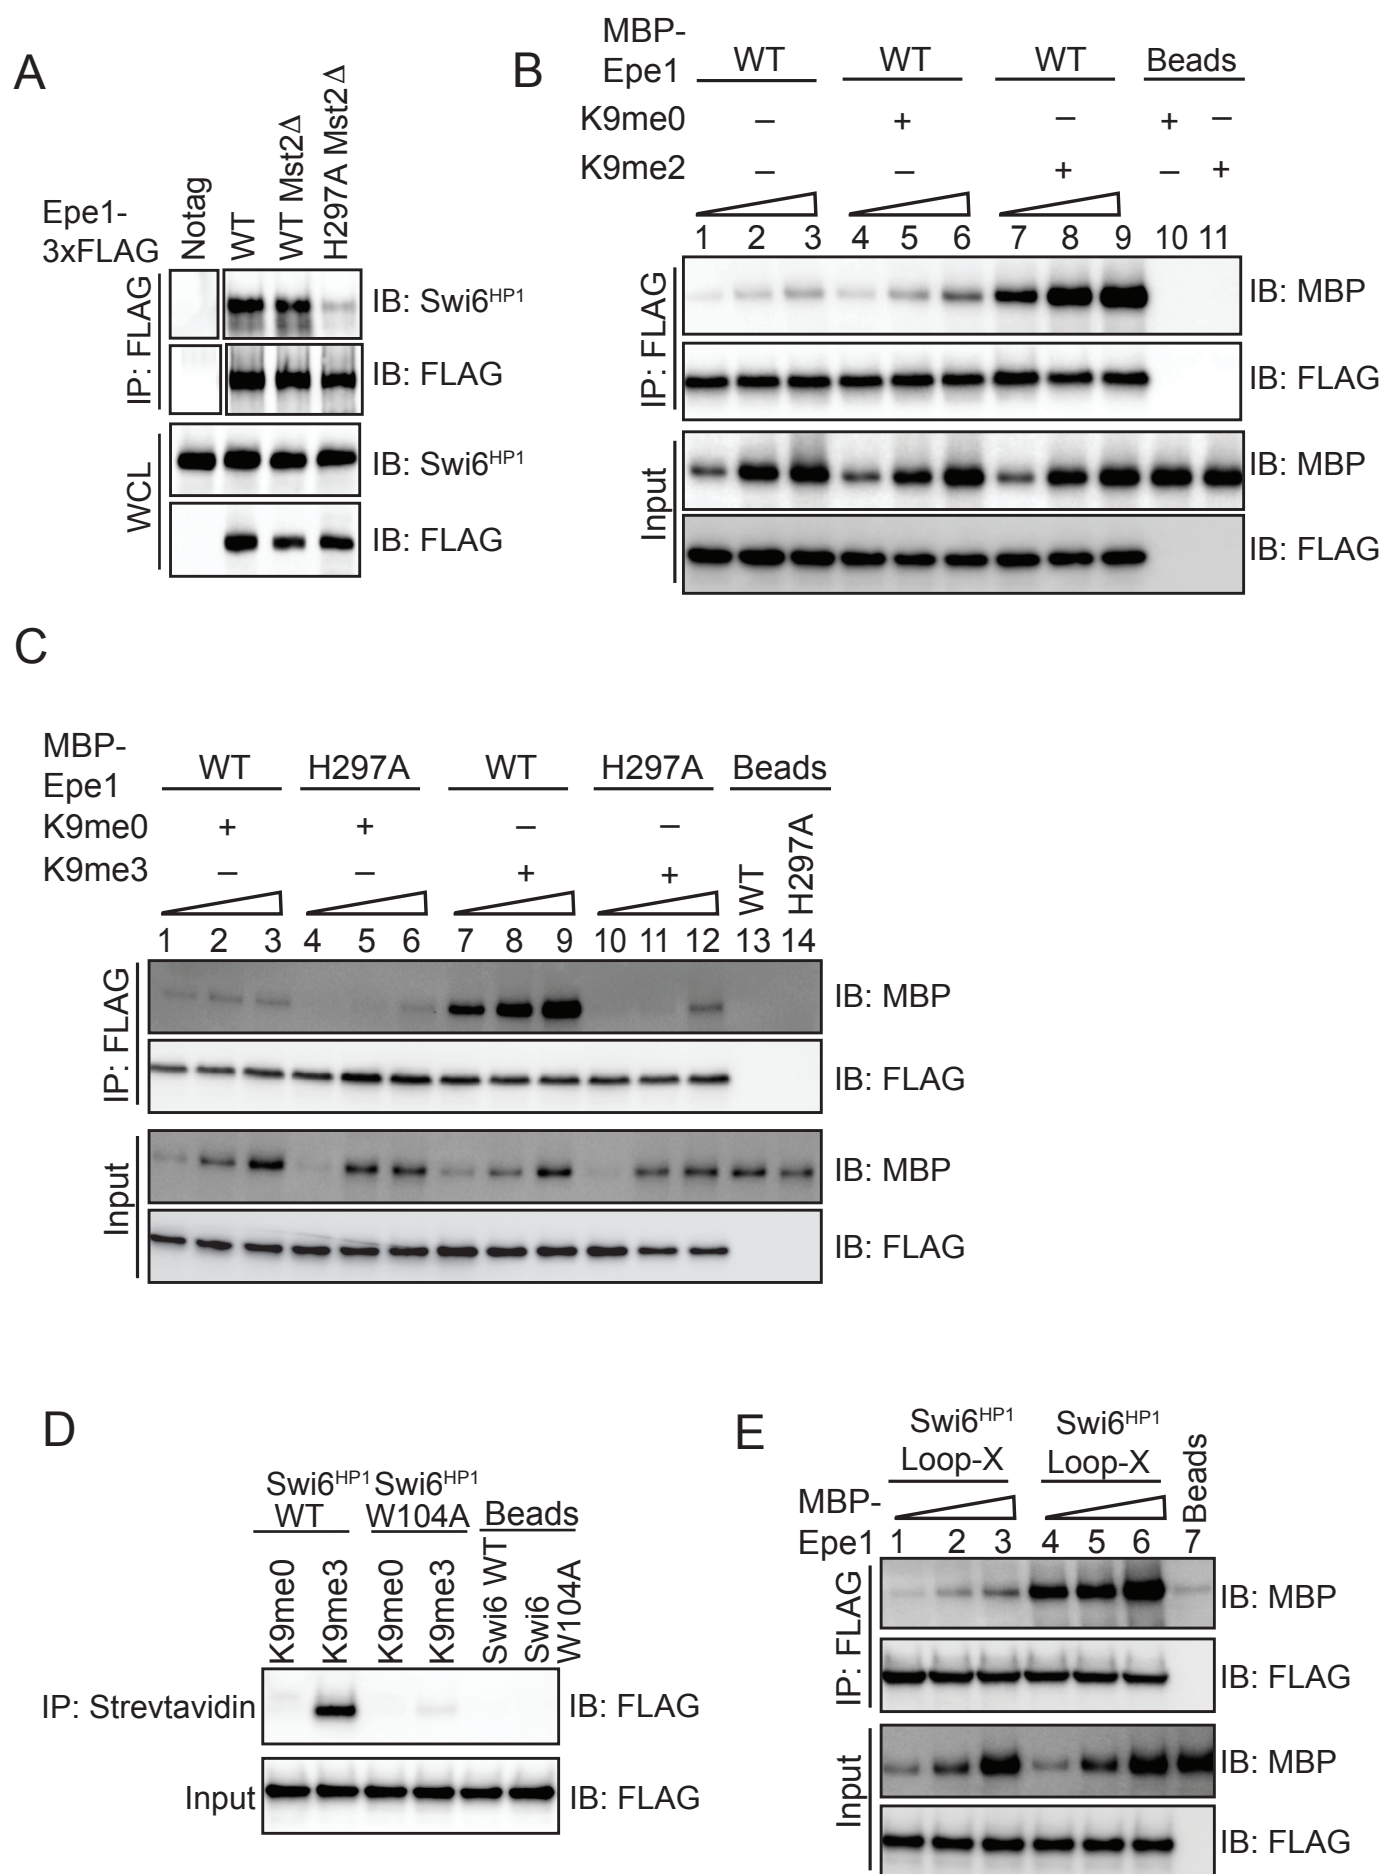

Supplement: supp [file elife_poa_e53155_Figure_4_figure_supplement_1.pdf › elife_poa_e53155_Figure_4_figure_supplement_1.pdf]

Figure 5-figure supplement 1

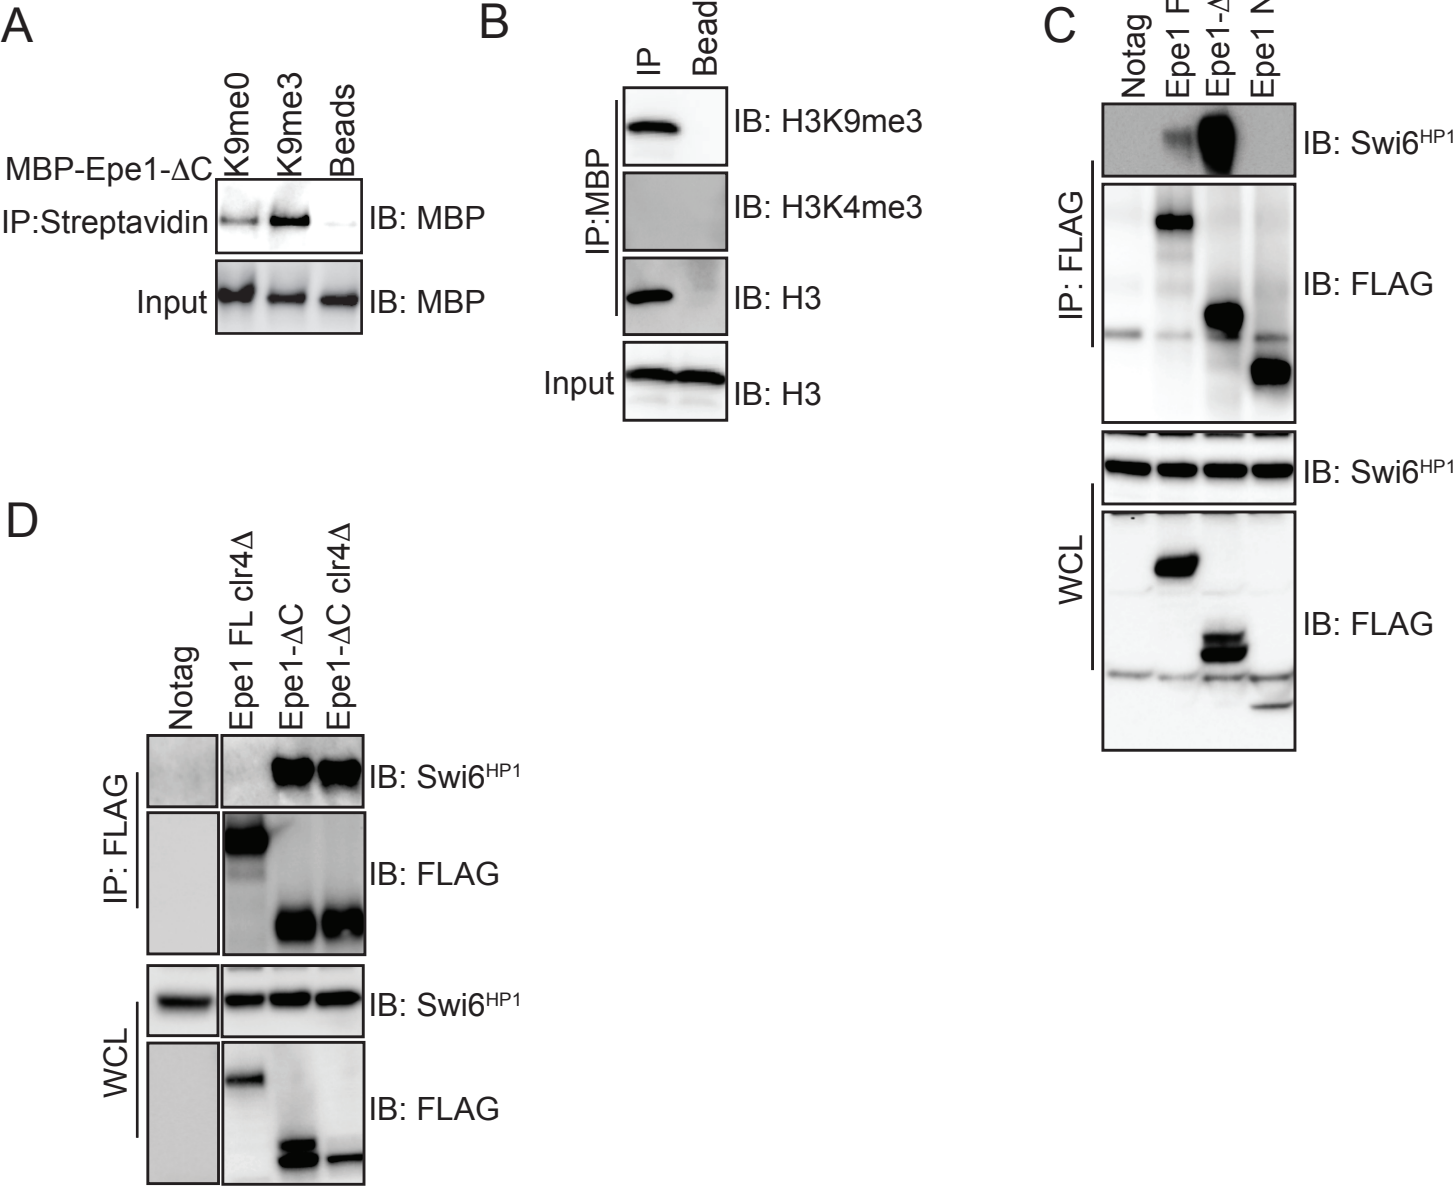

Supplement: supp [file elife_poa_e53155_Figure_5_figure_supplement_1.pdf › elife_poa_e53155_Figure_5_figure_supplement_1.pdf]

Figure 6-figure supplement 1

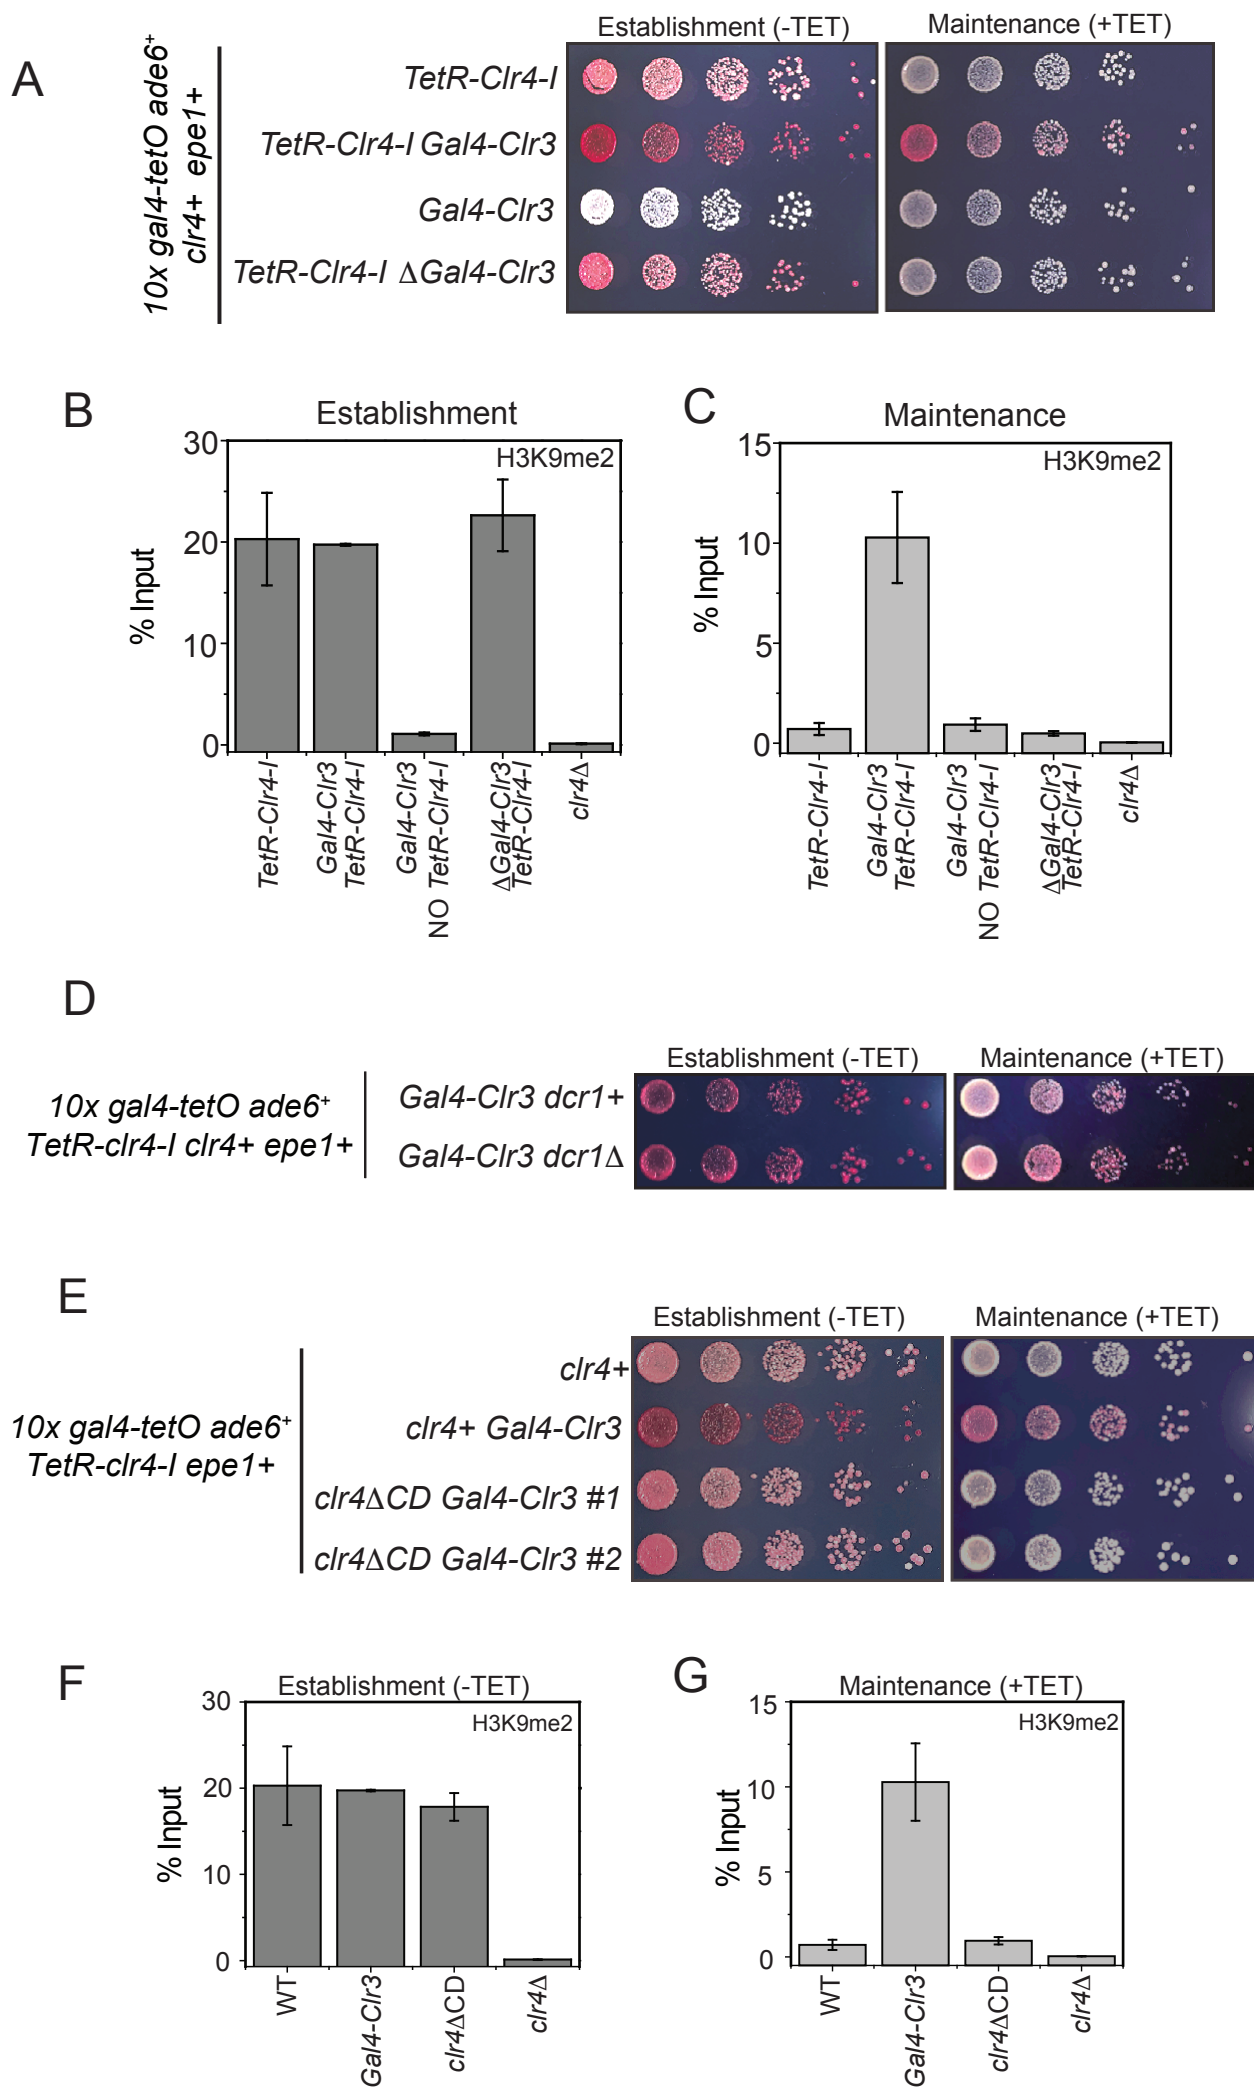

Supplement: supp [file elife_poa_e53155_Figure_6_figure_supplement_1.pdf › elife_poa_e53155_Figure_6_figure_supplement_1.pdf]
